# Supplementary material
Source: Research Square preprint supplement (doi:10.21203/rs.3.rs-9131141/v1)
Supplement: Supplementary file 1 [file ae7617d91836f6344d335b56.docx]

**2.Study Design, Materials and Methods**

**2.1 Study Design**

This was a single-centre, observational, prospective cohort study conducted at CHU Sherbrooke (QC, Canada). The study adhered to the STROBE guidelines for cohort studies and was registered on ClinicalTrials.gov as to the eMESH (energy MEtabolism of Septic Hearts) study (Identifier: NCT05202938). The inclusion period extended from the end of October 2022 to the end of November 2025.

**2.2 Patient Screening and Care**

All patients admitted to the Intensive Care Unit (ICU) and the Acute Coronary Care Unit (ACCU) were screened by the research staff for eligibility. Patient information was recorded in a screening log. Standard care and clinical decision-making by the attending physician were uniformly applied to all included patients. The study involved neither randomization nor blinding.

**2.3 Definition of Study Groups, PET Imaging Conditions, and Timing of Inclusion**

All patients admitted for an acute symptomatic shock condition were potentially eligible for participation. Daily identification, recruitment, consent, follow-up, and blood sample collection were managed by the Intensive Care Clinical Research Team. The inclusion window was limited to 48 hours following admission.

Although standard PET imaging protocols require a fasting period, the primary objective of this study was to image and quantify myocardial metabolism as rapidly as possible under real-world clinical conditions. Therefore, fasting was not mandatory; however, all patients were effectively fasted due to their clinical status. Conversely, the use of medications known to interfere with metabolic processes or tracer uptake (propofol, etomidate, insulin, or dextrose >5%) was prohibited. Specifically, propofol- and etomidate-containing formulations, which are rich in FA, had to be discontinued or substituted at least 8 hrs prior to imaging. If insulin had been administered, it was discontinued at least 4 hrs before imaging for intravenous short-acting formulations, 8 hrs for subcutaneous short-acting formulations, and at least 12 hrs for intermediate- and long-acting formulations. Vasoactive drugs eventually administered as a continuous infusion may have been weaned off up to a maximum of 8 hrs before PET imaging.

Bedside transthoracic echocardiography was performed in all patients within 24 hrs before PET imaging using a mobile ultrasound system (Vivid E95, GE HealthCare), in accordance with the American Society of Echocardiography and the European Association of Cardiovascular Imaging guidelines [1]. Left ventricular ejection fraction (LVEF) was calculated using the biplane Simpson’s method. An ultrasound contrast agent (Definity®) was used when necessary. Cardiac output was calculated from left ventricular stroke volume (LVSV) multiplied by heart rate (HR) and indexed to body surface area (L·min⁻¹·m⁻²). LVSV (cm³) was calculated as the product of the left ventricular outflow tract velocity–time integral (LVOT-VTI, cm) and the LV outflow area (AVA, cm²).

Based on echocardiographic findings, patients were assigned to one of three groups:

1. **Septic shock (SS) with acute myocardial contractile dysfunction**, hereafter referred to as sepsis-induced myocardial dysfunction (SIMD), defined by the absence of regional wall motion abnormalities and either a de novo LVEF <45% or a ≥20% decrease in LVEF compared with an echocardiogram performed within the preceding 2 years, and requiring vaso-inotropic support after initial fluid resuscitation (SS with SIMD).
2. **Septic shock without evidence of acute myocardial contractile dysfunction** (LVEF ≥45%), requiring vaso-inotropic support after initial fluid resuscitation (SS without SIMD).
3. **Acute heart failure with reduced ejection fraction (AHFrEF)**, defined by de novo myocardial contractile dysfunction with an LVEF ≤40% or a ≥20% decrease in LVEF compared with an echocardiogram obtained within the previous 2 years, with or without vaso-inotropic support and without septic shock.

Sepsis was defined according to Sepsis-3 criteria [2], fluid resuscitation followed updated Surviving Sepsis Campaign (SSC) guidelines [3], and acute heart failure with de novo HFrEF was defined according to American College of Cardiology (ACC) guidelines [4].

**2.4 Patient Cohort Criteria**

Inclusion Criteria

- Age ≥18 years
- Admission to the ICU or ACCU within 48 hrs prior to cardiac PET imaging
- Availability of echocardiographic LVEF assessment for group allocation
- Clinical and/or microbiological evidence of sepsis (for septic shock groups) or evidence of a non-septic etiology (for the AHFrEF group)

Exclusion Criteria

- Age <18 years
- Hemodynamic instability primarily due to non-septic and/or non-cardiogenic causes
- Clinical instability precluding safe transport to the PET facility, as determined by the attending team [5]
- Pregnancy or breastfeeding
- Known hypersensitivity or allergy to albumin (e.g., traces in [¹¹C]-Palmitate) or PET tracers
- Use of interfering medications (propofol, etomidate, insulin, or dextrose >5%) prior to PET imaging -see beyond-
- Outside the inclusion time window
- End-of-life or comfort-care-only status with do-not-resuscitate orders
- Unavailability of the research team or cardiac PET system

**2.5 Time Points and Data Collection**

All data collection and blood sampling were performed on the day of cardiac PET imaging.

**2.6 Demographic, Therapeutic, and Outcome Data**

Baseline demographic data were recorded. Hemodynamic support therapies administered prior to imaging were quantified using the vaso-inotropic score (VIS) [6]. Outcome measures, including APACHE II, SOFA, and Charlson comorbidity indices, were collected as described previously [7].

**2.7 Biomarkers**

Ten milliliters of blood were collected at baseline. Samples were rapidly centrifuged at +4 °C, and plasma was aliquoted into 2 mL polypropylene cryogenic tubes and stored at −80 °C. EDTA plasma was used for all biomarker analyses.

EDTA plasma samples were centrifuged at 1,600 × g for 10 minutes. High-sensitivity troponin T and NT-proBNP were measured using quantitative immunoassays (Cobas h232 system, Roche Diagnostics), with reference ranges of 0–14 ng/L and 0–300 ng/L, respectively. Plasma concentrations of galectin-3 (Gal-3), growth differentiation factor-15 (GDF-15), and insulin were measured using commercially available ELISA kits (Quantikine LGALS3 and DGAL30, R&D Systems; human insulin, ThermoFisher Scientific; human GDF-15, ProteinTech). Plasma glucose and free fatty acids were analyzed using a clinical chemistry analyzer (Dimension Xpand Plus, Siemens), with normal reference ranges of 5.55–7.77 mmol/L and <1.7 mmol/L, respectively. High blood troponins; Galectin-3; and GDF-15 identify septic patients with higher risk of death and cardiac injury [8-13]. GDF-15 is also recognized as a key regulator of energy metabolism [14].

**2.8 Cardiac PET Imaging**

**2.8.1 Imaging Protocol**

PET images were acquired using a PET/CT scanner with a 26-cm axial field of view (Siemens Biograph Vision 600, CRCHUS). Dynamic and cardiac-gated images were reconstructed from list-mode acquisitions using an iterative algorithm incorporating point spread function and time-of-flight modeling. Sequential scan durations were 15 minutes for [¹¹C]-acetate, 15 minutes for [¹¹C]-palmitate, and 25 minutes for [¹⁸F]-FDG [15-16]. Dynamic reconstruction frames for [¹¹C]-acetate and [¹¹C]-palmitate were 12 × 10 s, 6 × 30 s, 2 × 150 s, and 1 × 300 s; three additional 300-s frames were added for [¹⁸F]-FDG. Cardiac gating was applied to [¹¹C]-acetate images acquired 5–15 minutes post-injection and reconstructed into 16 gates. All images were reconstructed using a 220 × 220 matrix and voxel dimensions of 1.65 × 1.65 × 3.0 mm³.

**2.8.2 Image Processing**

Image preprocessing was performed using PMOD version 3.9 (PCARD module). Automatic cardiac segmentation was applied and manually adjusted for each participant. All images were analyzed by a single operator (OS) blinded to group allocation.

Myocardial fatty acid oxidation (MFAO) and esterification (MFAE) were calculated from [¹¹C]-palmitate images using a three-tissue, two-compartment kinetic model with a fixed k3p and normalized to circulating free fatty acid levels. Myocardial FA uptake (MFAUp) was calculated as the sum of MFAO and MFAE, and the proportion of esterified fatty acids was expressed as MFAE/MFAUp (%). As this model is not implemented in PMOD, in-house software was used. The myocardial metabolic rate of glucose (MMRGlu) was calculated using the Patlak model applied to [¹⁸F]-FDG images. Cardiac-gated images were used to calculate ventricular volumes, real-time LVEF, ventricular mass, and myocardial weight, assuming uniform tissue density.

Myocardial blood flow (MBF), K₁, and k₂ were derived from [¹¹C]-acetate data using a tracer-specific two-tissue, one-compartment model in PMOD. The monoexponential clearance constant (kmono) was obtained from semi-logarithmic fitting. The work metabolic index (WMI) was calculated as (stroke volume index × heart rate) / kmono. Myocardial external efficiency (MEE) was calculated as: MEE = (MAP × FCO × 1.33 × 10⁻⁴) / (MVO₂ × LVM × 20) × 100 where MAP is mean arterial pressure, FCO is forward cardiac output, MVO₂ is myocardial oxygen consumption, and LVM is left ventricular mass. MAP was calculated as (SBP + 2 × DBP) / 3. MVO₂ was derived from the k₂ rate constant (MVO₂ = 1.35 × k₂ − 9.6 × 10⁻³). FCO was calculated as HR × stroke volume (SV), with SV defined as end-diastolic volume minus end-systolic volume. LVM was obtained from gated [¹¹C]-acetate image segmentation.

**2.9 Ethics**

This study was approved by the Comité d’Éthique de la Recherche en Santé chez l’Humain du CIUSSS de l’Estrie–CHUS (approval #2021-4012; final approval July 2, 2021). Due to the critical condition of many patients, informed consent was sometimes initially obtained from a substitute decision maker. Once decision-making capacity was regained, consent was sought directly from the patient in accordance with Québec’s Mental Capacity Act (P-41) and the Declaration of Helsinki. Health Canada issued a non-objection letter for [¹¹C]-acetate and -palmitate use on March 9, 2022. Patient screening began on July 20, 2022, with final inclusion on November 28, 2025.

**2.10 Sample Size Considerations and Statistical Analyses**

The primary objective of this single-centre study was to assess feasibility and inform the design of a larger multicentre trial. A pragmatic sample size of eight patients per group was selected based on logistical and budgetary constraints. Screening and inclusion of unstable patients, coordination with PET availability, tracer synthesis and validation, and the 90-minute imaging protocol posed significant logistical challenges.

Categorical variables are presented as frequencies (percentages). Continuous variables are reported as means (standard deviations) or medians [interquartile ranges], depending on distribution assessed by the Shapiro–Wilk test. Group comparisons were performed using one-way ANOVA or Kruskal–Wallis tests as appropriate. Pearson correlation coefficients were calculated to assess associations between variables. Missing data are reported in table notes or figure legends; listwise deletion was applied, as missingness was minimal. A two-tailed p value <0.05 was considered statistically significant. Analyses were performed using GraphPad Prism version 9.3.1.

**REFERENCES**:

-1- Lang RM, Badano LP, Mor-Avi V, Afilalo J, Armstrong A, Ernande L, Flachskampf FA, Foster E, Goldstein SA, Kuznetsova T, Lancellotti P, Muraru D, Picard MH, Rietzschel ER, Rudski L, Spencer KT, Tsang W, Voigt JU. [Recommendations for cardiac chamber quantification by echocardiography in adults: an update from the American Society of Echocardiography and the European Association of Cardiovascular Imaging.](https://pubmed.ncbi.nlm.nih.gov/25559473/) J Am Soc Echocardiogr. 2015; 28:1-39.e14. doi: 10.1016/j.echo.2014.10.003.PMID: 25559473

-2- Singer M, Deutschman CS, Seymour CW, Shankar-Hari M, Annane D, Bauer M, Bellomo R, Bernard GR, Chiche JD, Coopersmith CM, Hotchkiss RS, Levy MM, Marshall JC, Martin GS, Opal SM, Rubenfeld GD, van der Poll T, Vincent JL, Angus DC. [The Third International Consensus Definitions for Sepsis and Septic Shock (Sepsis-3).](https://pubmed.ncbi.nlm.nih.gov/26903338/)JAMA. 2016; 315: 801-10. doi: 10.1001/jama.2016.0287. PMID: 26903338

-3- [Evans](https://pubmed.ncbi.nlm.nih.gov/?term=Evans+L&cauthor_id=34599691) L, [Rhodes](https://pubmed.ncbi.nlm.nih.gov/?term=Rhodes+A&cauthor_id=34599691) A, [Alhazzani](https://pubmed.ncbi.nlm.nih.gov/?term=Alhazzani+W&cauthor_id=34599691) W, [Antonelli](https://pubmed.ncbi.nlm.nih.gov/?term=Antonelli+M&cauthor_id=34599691) M, [Coopersmith](https://pubmed.ncbi.nlm.nih.gov/?term=Coopersmith+CM&cauthor_id=34599691) CM, [French](https://pubmed.ncbi.nlm.nih.gov/?term=French+C&cauthor_id=34599691) C, [Machado](https://pubmed.ncbi.nlm.nih.gov/?term=Machado+FR&cauthor_id=34599691) FR, [Mcintyre](https://pubmed.ncbi.nlm.nih.gov/?term=Mcintyre+L&cauthor_id=34599691) L, [Ostermann](https://pubmed.ncbi.nlm.nih.gov/?term=Ostermann+M&cauthor_id=34599691) M, [Prescott](https://pubmed.ncbi.nlm.nih.gov/?term=Prescott+HC&cauthor_id=34599691) HC, [Schorr](https://pubmed.ncbi.nlm.nih.gov/?term=Schorr+C&cauthor_id=34599691) C, [Simpson](https://pubmed.ncbi.nlm.nih.gov/?term=Simpson+S&cauthor_id=34599691) S, [Wiersinga](https://pubmed.ncbi.nlm.nih.gov/?term=Wiersinga+WJ&cauthor_id=34599691) WJ, [Alshamsi](https://pubmed.ncbi.nlm.nih.gov/?term=Alshamsi+F&cauthor_id=34599691) F, [Angus](https://pubmed.ncbi.nlm.nih.gov/?term=Angus+DC&cauthor_id=34599691) DC, [Arabi](https://pubmed.ncbi.nlm.nih.gov/?term=Arabi+Y&cauthor_id=34599691) Y, [Azevedo](https://pubmed.ncbi.nlm.nih.gov/?term=Azevedo+L&cauthor_id=34599691) L, [Beale](https://pubmed.ncbi.nlm.nih.gov/?term=Beale+R&cauthor_id=34599691) R, [Beilman](https://pubmed.ncbi.nlm.nih.gov/?term=Beilman+G&cauthor_id=34599691) G, [Belley-Cote](https://pubmed.ncbi.nlm.nih.gov/?term=Belley-Cote+E&cauthor_id=34599691) E, [Burry](https://pubmed.ncbi.nlm.nih.gov/?term=Burry+L&cauthor_id=34599691) L, [Cecconi](https://pubmed.ncbi.nlm.nih.gov/?term=Cecconi+M&cauthor_id=34599691) M, [Centofanti](https://pubmed.ncbi.nlm.nih.gov/?term=Centofanti+J&cauthor_id=34599691) J, [Coz Yataco](https://pubmed.ncbi.nlm.nih.gov/?term=Coz+Yataco+A&cauthor_id=34599691) AC, [De Waele](https://pubmed.ncbi.nlm.nih.gov/?term=De+Waele+J&cauthor_id=34599691) J, [Dellinger](https://pubmed.ncbi.nlm.nih.gov/?term=Dellinger+RP&cauthor_id=34599691) RP, [Doi](https://pubmed.ncbi.nlm.nih.gov/?term=Doi+K&cauthor_id=34599691) K, [Du](https://pubmed.ncbi.nlm.nih.gov/?term=Du+B&cauthor_id=34599691) B, [Estenssoro](https://pubmed.ncbi.nlm.nih.gov/?term=Estenssoro+E&cauthor_id=34599691) E, [Ferrer](https://pubmed.ncbi.nlm.nih.gov/?term=Ferrer+R&cauthor_id=34599691) R, [Gomersall](https://pubmed.ncbi.nlm.nih.gov/?term=Gomersall+C&cauthor_id=34599691) C, [Hodgson](https://pubmed.ncbi.nlm.nih.gov/?term=Hodgson+C&cauthor_id=34599691) C, [Møller](https://pubmed.ncbi.nlm.nih.gov/?term=M%C3%B8ller+MH&cauthor_id=34599691) MH, [Iwashyna](https://pubmed.ncbi.nlm.nih.gov/?term=Iwashyna+T&cauthor_id=34599691) T, [Jacob](https://pubmed.ncbi.nlm.nih.gov/?term=Jacob+S&cauthor_id=34599691) S, [Kleinpell](https://pubmed.ncbi.nlm.nih.gov/?term=Kleinpell+R&cauthor_id=34599691) R, [Klompas](https://pubmed.ncbi.nlm.nih.gov/?term=Klompas+M&cauthor_id=34599691) M,  [Koh](https://pubmed.ncbi.nlm.nih.gov/?term=Koh+Y&cauthor_id=34599691) Y, [Anand Kumar](https://pubmed.ncbi.nlm.nih.gov/?term=Kumar+A&cauthor_id=34599691) A, [Kwizera](https://pubmed.ncbi.nlm.nih.gov/?term=Kwizera+A&cauthor_id=34599691) A, [Lobo](https://pubmed.ncbi.nlm.nih.gov/?term=Lobo+S&cauthor_id=34599691) S, [Masur](https://pubmed.ncbi.nlm.nih.gov/?term=Masur+H&cauthor_id=34599691) H, [McGloughlin](https://pubmed.ncbi.nlm.nih.gov/?term=McGloughlin+S&cauthor_id=34599691) S, [Mehta](https://pubmed.ncbi.nlm.nih.gov/?term=Mehta+S&cauthor_id=34599691) S, [Mehta](https://pubmed.ncbi.nlm.nih.gov/?term=Mehta+Y&cauthor_id=34599691) Y, [Mer](https://pubmed.ncbi.nlm.nih.gov/?term=Mer+M&cauthor_id=34599691) M, [Nunnally](https://pubmed.ncbi.nlm.nih.gov/?term=Nunnally+M&cauthor_id=34599691) M, [Oczkowski](https://pubmed.ncbi.nlm.nih.gov/?term=Oczkowski+S&cauthor_id=34599691) S, [Osborn](https://pubmed.ncbi.nlm.nih.gov/?term=Osborn+T&cauthor_id=34599691) T, [Papathanassoglou](https://pubmed.ncbi.nlm.nih.gov/?term=Papathanassoglou+E&cauthor_id=34599691) E, [Perner](https://pubmed.ncbi.nlm.nih.gov/?term=Perner+A&cauthor_id=34599691) A, [Puskarich](https://pubmed.ncbi.nlm.nih.gov/?term=Puskarich+M&cauthor_id=34599691) M, [Roberts](https://pubmed.ncbi.nlm.nih.gov/?term=Roberts+J&cauthor_id=34599691) J, [Schweickert](https://pubmed.ncbi.nlm.nih.gov/?term=Schweickert+W&cauthor_id=34599691) W, [Seckel](https://pubmed.ncbi.nlm.nih.gov/?term=Seckel+M&cauthor_id=34599691) M, [Sevransky](https://pubmed.ncbi.nlm.nih.gov/?term=Sevransky+J&cauthor_id=34599691) J, [Sprung](https://pubmed.ncbi.nlm.nih.gov/?term=Sprung+CL&cauthor_id=34599691) CL, [Welte](https://pubmed.ncbi.nlm.nih.gov/?term=Welte+T&cauthor_id=34599691) T, [Zimmerman](https://pubmed.ncbi.nlm.nih.gov/?term=Zimmerman+J&cauthor_id=34599691) J, [Levy](https://pubmed.ncbi.nlm.nih.gov/?term=Levy+M&cauthor_id=34599691) M. Surviving sepsis campaign: international guidelines for management of sepsis and septic shock. Intensive Care Med. 2021; 47: 1181-1247. doi: 10.1007/s00134-021-06506-y. PMID: 34599691

-4- Heidenreich PA, Bozkurt B, Aguilar D, Larry A. Allen LA, [Byun](https://www.ahajournals.org/doi/10.1161/CIR.0000000000001062#con5) JJ, [Colvin MM](https://www.ahajournals.org/doi/10.1161/CIR.0000000000001062#con6), Deswal A, Drazner MH, Dunlay SM, [Evers LR,](https://www.ahajournals.org/doi/10.1161/CIR.0000000000001062#con10)Fang JC, Fedson SE, Fonarow GC, Hayek SS, Hernandez AF, Khazanie P, Kittleson MM, Lee CS, Link MS, Milano CA, Nnacheta LC, Sandhu AT, Stevenson LW, Vardeny O, Vest AR, Yancy CW. 2022 AHA/ACC/HFSA Guideline for the Management of Heart Failure: Executive Summary: A Report of the American College of Cardiology/American Heart Association Joint Committee Members. Circulation. 2022;145: e895-e1032. doi:10.1161/CIR.0000000000001063. PMID: 35363499

-5- [Fernando](https://ccforum.biomedcentral.com/articles/10.1186/s13054-019-2355-3#auth-Shannon_M_-Fernando-Aff1-Aff2) SM, [Fox-Robichaud](https://ccforum.biomedcentral.com/articles/10.1186/s13054-019-2355-3#auth-Alison_E_-Fox_Robichaud-Aff3) AE, [Rochwerg](https://ccforum.biomedcentral.com/articles/10.1186/s13054-019-2355-3" \l "auth-Bram-Rochwerg-Aff3-Aff4) B, [Cardinal](https://ccforum.biomedcentral.com/articles/10.1186/s13054-019-2355-3#auth-Pierre-Cardinal-Aff1) P, [Seely](https://ccforum.biomedcentral.com/articles/10.1186/s13054-019-2355-3#auth-Andrew_J__E_-Seely-Aff1-Aff5-Aff6-Aff7) AJE, [Perry](https://ccforum.biomedcentral.com/articles/10.1186/s13054-019-2355-3#auth-Jeffrey_J_-Perry-Aff2-Aff5-Aff6) JJ, [McIsaac](https://ccforum.biomedcentral.com/articles/10.1186/s13054-019-2355-3#auth-Daniel_I_-McIsaac-Aff5-Aff6-Aff8) DI, [Tran](https://ccforum.biomedcentral.com/articles/10.1186/s13054-019-2355-3#auth-Alexandre-Tran-Aff5-Aff7) A, [Skitch](https://ccforum.biomedcentral.com/articles/10.1186/s13054-019-2355-3#auth-Steven-Skitch-Aff3-Aff9) S, [Tam](https://ccforum.biomedcentral.com/articles/10.1186/s13054-019-2355-3#auth-Benjamin-Tam-Aff3) B, [Hickey](https://ccforum.biomedcentral.com/articles/10.1186/s13054-019-2355-3#auth-Michael-Hickey-Aff1-Aff2-Aff5) M, [Reardon](https://ccforum.biomedcentral.com/articles/10.1186/s13054-019-2355-3#auth-Peter_M_-Reardon-Aff1-Aff2) PM, [Tanuseputro](https://ccforum.biomedcentral.com/articles/10.1186/s13054-019-2355-3#auth-Peter-Tanuseputro-Aff5-Aff6-Aff10) P, [Kyeremanteng](https://ccforum.biomedcentral.com/articles/10.1186/s13054-019-2355-3" \l "auth-Kwadwo-Kyeremanteng-Aff1-Aff6-Aff10-Aff11) K .  Prognostic accuracy of the Hamilton Early Warning Score (HEWS) and the National Early Warning Score 2 (NEWS2) among hospitalized patients assessed by a rapid response team. [Critical Care](https://ccforum.biomedcentral.com/). 2019; 23: 60. DOI: [10.1186/s13054-019-2355-3](https://doi.org/10.1186/s13054-019-2355-3). PMID: 30791952

-6- [Koponen](https://pubmed.ncbi.nlm.nih.gov/?term=%22Koponen%20T%22%5bAuthor%5d) T, [Karttunen](https://pubmed.ncbi.nlm.nih.gov/?term=%22Karttunen%20J%22%5bAuthor%5d) J, [Musialowicz](https://pubmed.ncbi.nlm.nih.gov/?term=%22Musialowicz%20T%22%5bAuthor%5d) T, [Pietiläinen](https://pubmed.ncbi.nlm.nih.gov/?term=%22Pietil%C3%A4inen%20L%22%5bAuthor%5d) L, [Uusaro](https://pubmed.ncbi.nlm.nih.gov/?term=%22Uusaro%20A%22%5bAuthor%5d) A, [Lahtinen](https://pubmed.ncbi.nlm.nih.gov/?term=%22Lahtinen%20P%22%5bAuthor%5d) P. Vasoactive-inotropic score and the prediction of morbidity and mortality after cardiac surgery. Br J Anaesth. 2019; 122:428–436. doi: [10.1016/j.bja.2018.12.019](https://doi.org/10.1016/j.bja.2018.12.019). PMID: [30857599](https://pubmed.ncbi.nlm.nih.gov/30857599/)

-7- Lesur O, Segal ED, Rego K, Mercat A, Asfar P, Chagnon F. [Process-Specific Blood Biomarkers and Outcomes in COVID-19 Versus Non-COVID-19 ARDS (APEL-COVID Study): A Prospective, Observational Cohort Study.](https://pubmed.ncbi.nlm.nih.gov/39407979/) J Clin Med. 2024;13:5919. doi: 10.3390/jcm13195919.PMID: 39407979

-8- Wettersten N, Maisel AS. [Biomarker developments in heart failure: 2016 and beyond.](https://pubmed.ncbi.nlm.nih.gov/30633074/) Curr Opin Cardiol. 2019; 34: 218-224. doi: 10.1097/HCO.0000000000000596. PMID: 30633074

-9- [Karabacak](https://pubmed.ncbi.nlm.nih.gov/?term=Karabacak+P&cauthor_id=37610926) P. Serum galectin-3 levels predict poor prognosis in sepsis and septic shock patients. Rev Assoc Med Bras (1992). 2023; 69: e20220940. doi: 10.1590/1806-9282.20220940. PMID: 37610926.

-10- Bessiere F, Khenife S, Dubourg J, Durieu I, Lega JC. Prognostic value of troponins in sepsis: A meta-analysis. Intensive Care Med. 2013; 39: 1181–1189. DOI: [10.1007/s00134-013-2902-3](https://doi.org/10.1007/s00134-013-2902-3). PMID: 23595497

-11- [Katrukha](javascript:;) IA, [Katrukha](javascript:;) AG. Myocardial Injury and the Release of Troponins I and T in the Blood of Patients. Clinical Chemistry. 2021; 67: 124-130. [doi.org/10.1093/clinchem/hvaa281](https://doi.org/10.1093/clinchem/hvaa281). PMID: 33418589

-12- [Buendgens](https://pubmed.ncbi.nlm.nih.gov/?term=%22Buendgens%20L%22%5bAuthor%5d) L, [Yagmur](https://pubmed.ncbi.nlm.nih.gov/?term=%22Yagmur%20E%22%5bAuthor%5d) E, [Bruensing](https://pubmed.ncbi.nlm.nih.gov/?term=%22Bruensing%20J%22%5bAuthor%5d) J, [Herbers](https://pubmed.ncbi.nlm.nih.gov/?term=%22Herbers%20U%22%5bAuthor%5d) U, [Baeck](https://pubmed.ncbi.nlm.nih.gov/?term=%22Baeck%20C%22%5bAuthor%5d) C, [Trautwein](https://pubmed.ncbi.nlm.nih.gov/?term=%22Trautwein%20C%22%5bAuthor%5d) C, [Koch](https://pubmed.ncbi.nlm.nih.gov/?term=%22Koch%20A%22%5bAuthor%5d) A, [Tacke](https://pubmed.ncbi.nlm.nih.gov/?term=%22Tacke%20F%22%5bAuthor%5d) F. Growth Differentiation Factor-15 Is a Predictor of Mortality in Critically Ill Patients with Sepsis. Dis Markers. 2017: 5271203. doi: [10.1155/2017/5271203](https://doi.org/10.1155/2017/5271203). PMID: [29180833](https://pubmed.ncbi.nlm.nih.gov/29180833/)

-13- Yang L, Feng JK, Gong P-X, Yao L-N, Li P. Advances in Research Pertaining to Biomarkers for Myocardial Injury in Sepsis. Shock. 2026;  [65: 134-141.](https://journals.lww.com/shockjournal/pages/currenttoc.aspx) DOI: 10.1097/SHK.0000000000002678

-14- [Chang](https://pubmed.ncbi.nlm.nih.gov/?term=%22Chang%20JY%22%5bAuthor%5d) JY, [Hong](https://pubmed.ncbi.nlm.nih.gov/?term=%22Hong%20HJ%22%5bAuthor%5d) HJ, [Kang](https://pubmed.ncbi.nlm.nih.gov/?term=%22Kang%20SG%22%5bAuthor%5d) SG, [Kim](https://pubmed.ncbi.nlm.nih.gov/?term=%22Kim%20JT%22%5bAuthor%5d) JT, [Zhang](https://pubmed.ncbi.nlm.nih.gov/?term=%22Zhang%20BY%22%5bAuthor%5d) BY, [Shong](https://pubmed.ncbi.nlm.nih.gov/?term=%22Shong%20M%22%5bAuthor%5d) M. The Role of Growth Differentiation Factor 15 in Energy Metabolism. Diabetes Metab J. 2020; 44: 363–371. doi: [10.4093/dmj.2020.0087](https://doi.org/10.4093/dmj.2020.0087). PMID: [32613776](https://pubmed.ncbi.nlm.nih.gov/32613776/)

-15- [de Jong](https://link.springer.com/article/10.1007/s00259-008-1035-3#auth-Hugo_W__A__M_-Jong-Aff1-Aff2) HWAM, [Rijzewijk](https://link.springer.com/article/10.1007/s00259-008-1035-3" \l "auth-Luuk_J_-Rijzewijk-Aff3) LJ, [Lubberink](https://link.springer.com/article/10.1007/s00259-008-1035-3" \l "auth-Mark-Lubberink-Aff2) M, [van der Meer](https://link.springer.com/article/10.1007/s00259-008-1035-3#auth-Rutger_W_-Meer-Aff4) RW, [Lamb](https://link.springer.com/article/10.1007/s00259-008-1035-3#auth-Hildo_J_-Lamb-Aff4) HJ, [Smit](https://link.springer.com/article/10.1007/s00259-008-1035-3#auth-Jan_W__A_-Smit-Aff5) JWA, [Diamant](https://link.springer.com/article/10.1007/s00259-008-1035-3#auth-Micha_la-Diamant-Aff3) M  [Lammertsma](https://link.springer.com/article/10.1007/s00259-008-1035-3#auth-Adriaan_A_-Lammertsma-Aff2) AA. Kinetic models for analysing myocardial [11C]palmitate data. [European Journal of Nuclear Medicine and Molecular Imaging](https://link.springer.com/journal/259). 2009; 36:966–978. doi: 10.1007/s00259-008-1035-3. PMID: 19172268

-16- Montastier É, Ye RZ, Noll C, Amrani M, Frisch F, Fortin M, Bouffard L, Phoenix S, Sarrhini O, Cunnane SC, Guérin B, Turcotte EE, Carpentier AC. [Nicotinic acid increases adipose tissue dietary fatty acid trapping and reduces postprandial hepatic and cardiac fatty acid uptake in prediabetes.](https://pubmed.ncbi.nlm.nih.gov/40157702/) Eur J Pharmacol. 2025; 998:177563. doi: 10.1016/j.ejphar.2025.177563. PMID: 40157702
